# Supplementary material
Source: publisher site journal article supplement (https://e-cmh.org/upload/media/cmh-2024-0042-Supplementary-Table-2.pdf)
Supplement: Supplementary file 1 [file cmh-2024-0042-Supplementary-Table-2.pdf]

**Supplementary Table 2.** Baseline characteristics of the included patients

| Variables   | Buffy coat WTS data (n=175) |                | Targeted proteome data (n=58) |              |
|-------------|-----------------------------|----------------|-------------------------------|--------------|
|             | HCC (n=129)                 | Non-HCC (n=46) | HCC (n=52)                    | Normal (n=6) |
| Male        | 107 (82.9)                  | 34 (73.9)      | 41 (78.8)                     | 1 (16.7)     |
| Age         | 59.1±12.0                   | 49.3±13.6      | 60±10.5                       | 30.0±3.9     |
| Etiology    |                             |                |                               |              |
| Viral (HBV) | 95 (73.6)                   | 29 (63)        | 43 (82.7)                     |              |
| Non-viral   | 34 (26.4)                   | 17 (37)        | 9 (17.3)                      |              |
| Cirrhosis   | 109 (84.5)                  | 15 (32.6)      | 46 (88)                       |              |
| Platelet    | 174.8±77.1                  | 202.6±75.7     | 176.7±78.7                    | 220.7±61.0   |
| AST         | 62.4±65.0                   | 53.7±35.0      | 53.4±32.5                     | 17.5±0.7     |
| ALT         | 42.6±44.9                   | 65.0±61.5      | 39.0±28.5                     | 12.5±0.7     |
| Albumin     | 4.2±0.6                     | 4.6±0.5        | 4.2±0.4                       | 4.4±0.9      |
| Bilirubin   | 1.3±2.8                     | 0.7±0.4        | 0.8±0.6                       | 0.5±0.4      |
| AFP         | 2,898.7±7,630.1             | 8.2±15.6       | 3,048.3±8,802                 | 1.4±0.5      |
| PT          | 13.5±2.2                    | 13.2±1.5       | 13.1±1.3                      |              |

Values are presented as number (%) or mean±standard deviation.

WTS, whole transcriptome sequencing; HCC, hepatocellular carcinoma; HBV, hepatitis B virus; AST, aspartate aminotransferase; ALT, alanine aminotransferase; AFT, alpha-fetoprotein; PT, prothrombin time.
